# Supplementary material for: Fast learning in free-foraging bumble bees is negatively correlated with lifetime resource collection
Source: PubMed Central journal article supplement (PMC5428240; doi:10.1038/s41598-017-00389-0), 2017-03-29
Supplement: 41598_2017_389_MOESM1_ESM.pdf [file 41598_2017_389_MOESM1_ESM.pdf]

1 **Title:** Fast learning in free-foraging bumble bees is negatively correlated with lifetime  
2 resource collection.

3

4 Supplementary Information

5

6 Lisa J. Evans<sup>1,2†\*</sup>, Karen E. Smith<sup>1†</sup>, Nigel E. Raine<sup>1,3</sup>

7 <sup>1</sup>School of Biological Sciences, Royal Holloway University of London, Egham, Surrey, TW20 0EX, UK

8 <sup>2</sup>Plant and Food Research, Hamilton, 3240, New Zealand

9 <sup>3</sup>School of Environmental Sciences, University of Guelph, Guelph, Ontario, N1G 2W1, Canada

10 † These authors contributed equally to the work.

11 \* Author for correspondence:

12 [lisa.evans@plantandfood.co.nz](mailto:lisa.evans@plantandfood.co.nz)

13

#### 14 **Section S1: Visual learning task methods**

15 Bees were pre-trained to forage on 30 bicoloured yellow (Perspex Yellow 260) and blue (Perspex Blue  
16 727) artificial flowers placed in a flight arena (120 x 100 x 35 cm). Each flower (24 x 24 mm: half yellow and half  
17 blue) was placed on a glass cylinder (40mm high) to raise them above the floor of the flight arena. During pre-  
18 training these flowers were rewarded with 5µl of 50% sucrose solution placed in the middle of the flower. All  
19 bees were allowed to forage freely on the flowers and the rewards were replenished as they were consumed,  
20 this gave them equal opportunity associate both blue and yellow with reward. Once an individual bee completed  
21 at least two consecutive foraging bouts, the bee was let into the arena alone to complete a further three foraging  
22 bouts. The number of flowers visited by the bee in each of these bouts was counted and the mean number used  
23 to estimate the volume of sucrose solution collected.

24 Bees were then trained individually in the flight arena with 10 blue and 10 yellow flowers (n = 20 flowers  
25 in total). Yellow flowers contained a (50% sucrose solution) reward, while blue flowers were unrewarding  
26 (empty). The volume of sucrose solution reward in the yellow flowers was calculated from the mean volume the  
27 test bee consumed during the three foraging bouts at the end of the pre-training period. For example, if a bee  
28 emptied 20 of the 30 pre-training flowers (20 x 5µl = 100µl), then this volume would be divided equally among  
29 the 10 rewarding flowers (10µl/ yellow flower). Bees were regarded as choosing a flower when they either  
30 approached or landed on them. Once a bee probed a yellow (rewarding) flower a further 99 choices were  
31 recorded, so each bee made sequence of at least 100 flower choices. Visits to (unrewarding) blue flowers were  
32 considered as errors, and visits to yellow flowers as correct choices. The choice sequence was captured using  
33 EthoLog 2.2.5 software <sup>1</sup> allowing the timing of each choice, and the duration of each foraging bout to be  
34 recorded. Flowers were changed between foraging bouts and their positions re-randomised within the flight

35 arena so that bees were unable to use previous odour cues (scent marks) or spatial position as predictors of  
 36 reward <sup>2</sup>.

37

### 38 Section S2: Calculating learning scores

39 Learning curves; first-order exponential decay functions ( $y = y_0 + Ae^{-x/t}$ ), were fitted to the flower choice  
 40 data for each bee using Microcal Origin pro 8.6. In this equation 'x' is the number of flower choices the bee made  
 41 after its first yellow flower probe, and 'y' is the number of errors. 'y<sub>0</sub>' is the saturation performance level - the  
 42 number of errors made by the bee when they reach a performance plateau. 't' is the decay constant of the curve  
 43 - a measure of learning speed (rate of change in task performance) and 'A' is the curve amplitude. The starting  
 44 point for each bee's learning curve was the proportion of errors made (number of blue flowers chosen) before  
 45 a bee probed a rewarding yellow flower for the first time. Flower choices made by each bee after and including  
 46 the first time it probed a rewarding yellow flower were evaluated as number of errors (blue flower choices) in  
 47 each group of 10 choices. The learning curve was fitted to these 11 data points, i.e. start point and subsequent  
 48 10 groups of 10 flower choices, for each individual bee <sup>3</sup>. To generate a single Learning Performance Index (LPI)  
 49 that took into account the rate of change in performance (slope of the learning curve), the shape of the learning  
 50 curve and variation in the saturation performance level, we summed the number of errors made by each bee  
 51 when it had made 5, 50, and 100 choices after probing a rewarding flower for the first time. This produced a  
 52 learning score out of 30. Low LPI values are indicative of faster learning while high values indicate slower learners  
 53 <sup>4</sup>. LPI was used as our measure of learning for all analysis, but we also ran the same models with the following  
 54 parameters: 't', 'y<sub>0</sub>' and 'A' (Table S1 and S2 below) for comparison. Results were similar for LPI and 't' (used in  
 55 previous publications as measure of learning speed: <sup>3</sup>).

56

57 Table S2: Candidate models to predict the number of days foraged, mean number of bouts per day and mean  
 58 bout duration.

|                             | No. of days foraged |          | Mean bouts per day |          | Men bout duration |          |
|-----------------------------|---------------------|----------|--------------------|----------|-------------------|----------|
|                             | AICc                | Δ AICc   | AICc               | Δ AICc   | AICc              | Δ AICc   |
| Basic                       | 90.59*              | 12.35    | 326.25             | 25.54    | 161.48            | 7.80     |
| Worker age                  | 91.14               | 12.89    | 322.75             | 22.05    | 155.86            | 2.17     |
| Worker size                 | 93.36               | 15.12    | 326.37             | 25.66    | 163.53            | 9.84     |
| Colony age                  | 92.54               | 14.30    | <b>300.71*</b>     | <b>0</b> | <b>153.69*</b>    | <b>0</b> |
| Best model + t              | <b>85.20</b>        | <b>0</b> | 303.06             | 2.35     | 155.69            | 2.35     |
| Best model + y <sub>0</sub> | 91.88               | 6.68     | 303.19             | 2.48     | 155.63            | 1.94     |
| Best model + A              | 92.85               | 7.65     | 301.98             | 1.27     | 156.15            | 2.46     |

59

60 The basic model contained only the intercept and colony membership as a random factor. All other models  
 61 contained the basic model and the additional fixed factors (predictors) specified in the model name. The model  
 62 with the lowest AICc value out of the five initial models (indicated with an asterisk) had either 't', 'y0' or 'A'  
 63 added to it to determine whether this significantly decreased the AICc value (i.e.  $\Delta AICc > 2$ ). The best model  
 64 (based on the AICc value) is shown in bold.

65

66 Table S2: Candidate models to predict pollen and nectar collection efficiency by tested bees.

|                 | Mean pollen collection |               | Men nectar collection |               |
|-----------------|------------------------|---------------|-----------------------|---------------|
|                 | AICc                   | $\Delta AICc$ | AICc                  | $\Delta AICc$ |
| Basic           | <b>-164.33*</b>        | <b>0</b>      | 76.77                 | 14.46         |
| Worker age      | -162.59                | 1.74          | 78.13                 | 15.82         |
| Worker size     | -161.82                | 2.51          | 79.71                 | 17.41         |
| Colony age      | -161.96                | 2.36          | 65.90                 | 3.60          |
| Experience      | -162.54                | 1.79          | <b>62.31*</b>         | <b>0</b>      |
| Best model + t  | -157.41                | 6.92          | 65.59                 | 3.28          |
| Best model + y0 | -157.60                | 6.73          | 63.65                 | 1.34          |
| Best model + A  | -158.17                | 6.16          | 62.48                 | 0.17          |

67 The basic model contained only the intercept and colony membership as a random factor. All other models  
 68 contained the basic model and the additional fixed factors (predictors) specified in the model name. The model  
 69 with the lowest AICc value out of the five initial models (indicated with an asterisk) had either 't', 'y0' or 'A'  
 70 added to it to determine whether this significantly decreased the AICc value (i.e.  $\Delta AICc > 2$ ). The best model  
 71 (based on the AICc value) is shown in bold.

72

### 73 Section S3: Assessing foraging efficiency and activity

74 Using data from the Radio Frequency Identification (RFID) system we calculated the mean number of  
 75 foraging bouts completed per day by each of our tested individuals. As only foragers were RFID-tagged assumed  
 76 that all trips away from the nest were foraging bouts, provided that the bee was gone for  $\geq 8$ min and upon their  
 77 return they remained in the nest for  $\geq 1$  min. (to off-load pollen and/or nectar). Whilst some previous authors  
 78 have used 10 minutes as their foraging bout threshold<sup>5,6</sup> we chose eight minutes because some bees ( $n = 7$ )  
 79 consistently made foraging trips lasting around eight minutes. To explore whether this bout threshold level  
 80 would affect our results (by potentially including non-foraging trips) we repeated the analysis using only bouts  
 81  $\geq 10$  min and found no change to the relationships reported. If a forager entered a second colony  $\leq 5$  min after  
 82 exiting a colony, it was assumed that this was its correct colony and the previously visited colony was an  
 83 orientation error. In these instances the foraging bout concluded at the second colony. When observing colonies

84 this appeared to be the case because foragers (which we could often identify using their coloured tags  
85 underneath the RFID tags) would enter the second colony still carrying their pollen or would have similar entry  
86 weights, which suggests they had not off-loaded nectar (or pollen) in the first colony. An exception to this rule  
87 was if a forager spent more time in the first colony it entered. When this occurred it was assumed that the visit  
88 to the second colony was the orientation error.

89 Foragers were observed to move between colonies during their foraging career. Such 'drifting' is a  
90 common occurrence between closely situated colonies<sup>7</sup> and comparable levels of drifting were observed by Gill  
91 et al.<sup>8</sup> in an experiment using a similar experimental setup. To take drifting into account, we identified the colony  
92 each forager visited for the majority of its foraging trips (the majority colony). On average, foraging bees  
93 performed  $61.88\% \pm 2.33$  of their foraging bouts for their majority colony, compared to  $37.36\% \pm 3.51$  for their  
94 natal colony. Based on these results we felt that majority colony was a more accurate indicator of colony  
95 membership and used this measure in our models.

96

#### 97 **Section S4: Fixed effects in GLMMs**

98 **Colony age** the number of days since the colony arrived in the lab when each focal worker was assessed and  
99 RFID tagged.

100 **Worker size** was obtained by averaging all outgoing mass recordings for each forager. Bees for which we had no  
101 observation data for (usually bees that completed very few foraging bouts) were assigned an outgoing body  
102 mass based on the average bee mass for their natal colony ( $n = 4$ ).

103 **Worker age** was either known, if they were tagged on the day of emergence, or estimated, if they were present  
104 when the colony arrived ( $n = 10$ ). Estimated ages were calculated by adding five days to the colony arrival date.

105 **Experience** was calculated for each bee by averaging the number of previous foraging trips made prior to the  
106 foraging bouts we observed. For example, if we observed a bee's 5<sup>th</sup>, 22<sup>nd</sup>, 35<sup>th</sup>, and 40<sup>th</sup> bouts, these were  
107 averaged to give an experience score of 25.5.

108

109 **Figure S1.** The divided colony box has four chambers and a mesh partition (2) that separates the two halves of  
110 the same colony. There are two chambers for each half of the colony, the inner chamber is their 'nesting' area  
111 (1 – containing the brood and food stores) the other was used as a temporary feeding chamber (3). One half of  
112 the colony was connected to a laboratory flight arena (internal side). Once the learning speed of each forager  
113 had been assessed, the bee was RFID tagged and moved to the other (external) side of the mesh partition. Bees  
114 on this side of the nest could leave to forage outside the laboratory. Each chamber was covered with transparent  
115 Perspex to enable observations. When not in use the chambers were also covered with a square of cardboard  
116 to create a dark environment similar to the natural nesting condition of subterranean bumble bees. When  
117 transferring tested bees from the internal side of the colony the chance of aggression was minimised by  
118 transferring them into the second chamber (3) on the external side of the divided colony box (rather than placing  
119 directly amongst the bees and brood). The two chambers were connected (3 & 1), allowing the transferred bee  
120 to integrate itself with colony members.

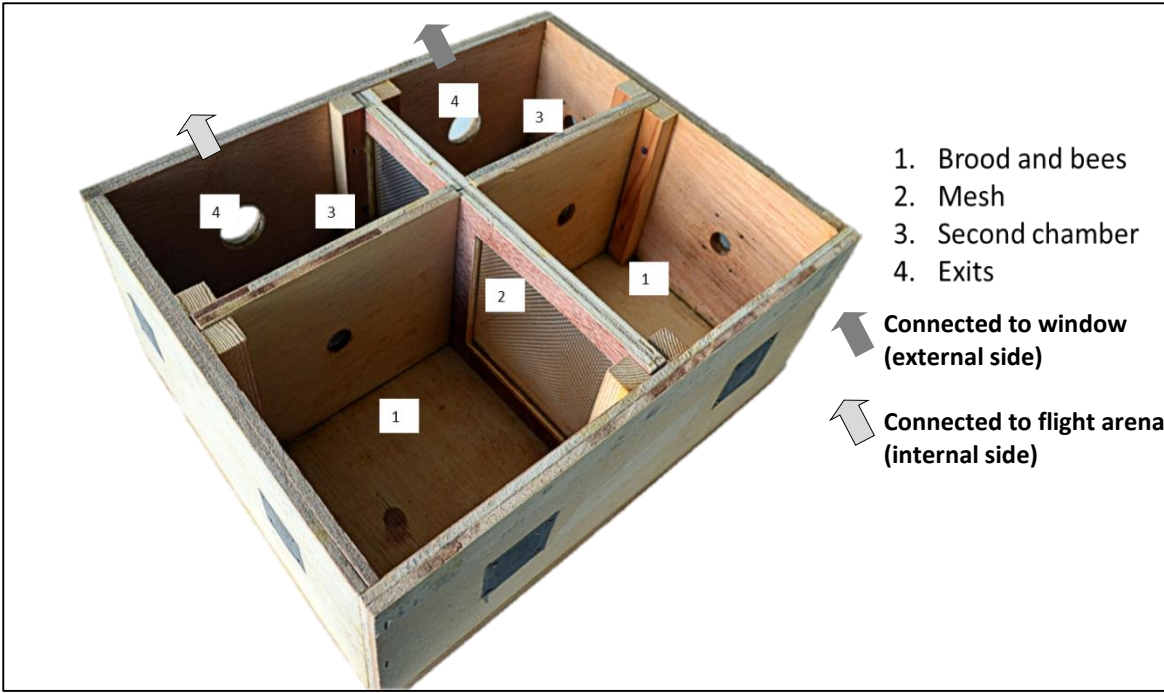

121  
122  
123

124 **Figure S2.** Experimental setup. The internal side (1) of the divided colony box is connected to a flight arena and  
 125 the external side (2) of the colony box was connected to a window via a tunnel made up of several different  
 126 components. A length of clear, flexible, tubing (3) was connected to the front of the colony box and then to a  
 127 clear Perspex tunnel (24 x 3 x 3 cm), which was positioned just above a weighing station (5: see also Figure S4  
 128 for details). After passing through the weighing station an outgoing forager would pass through two Radio-  
 129 Frequency Identification (RFID) readers (4). Using the two readers we could identify the direction of a tagged  
 130 forager's movement (i.e. leaving or entering the colony) and record the exact time and RFID number of the  
 131 tagged workers passing underneath<sup>8,9</sup>. Lastly, a ridged (ribbed) outlet tube (8) ran from the weighing station up  
 132 to the window (9). Outside the window was a landing platform (below the exit hole). Above the exit hole was a  
 133 unique black and white pattern (chosen to minimise any bias in colour return rates based on innately preferred  
 134 colours: Figure S3) to assist returning foragers to orientate back to their nest. The minimum distance between  
 135 exits was 38cm.  
 136

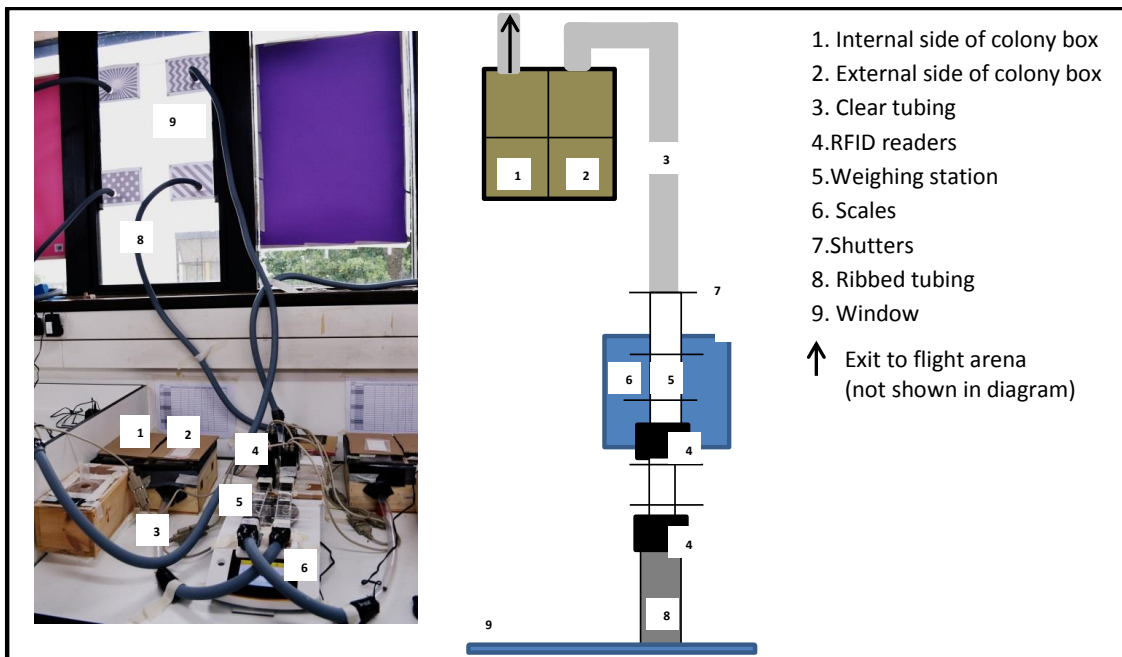

137  
 138  
 139

140 **Figure S3.** View of an exit hole with a landing platform and its unique black and white pattern from outside the  
141 laboratory window.

142

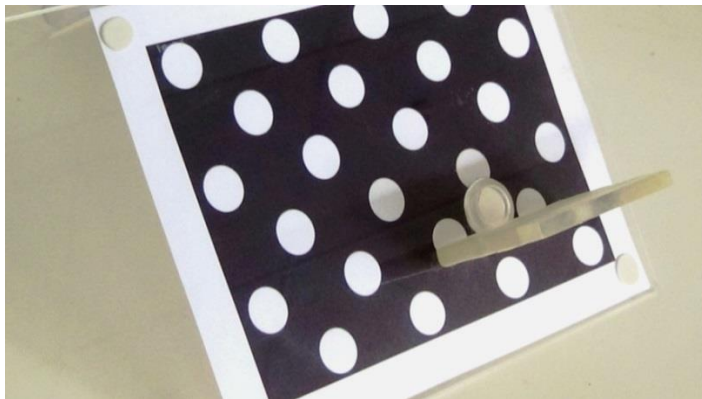

143

144

145

146 **Figure S4.** Weighing station setup. Each weighing station contained a number of shutters (one indicated with an  
147 arrow) to enable forager traffic to be controlled and temporarily restrict individual foragers above the balance.

148 As a forager walked over the balance pan it could be weighed using the dynamic weighing function (designed  
149 for weighing moving animals). Three mass recordings were taken for each bee and the average of these values

150 used in the analysis.

151

152

153

154

155

156

157

158

159

160

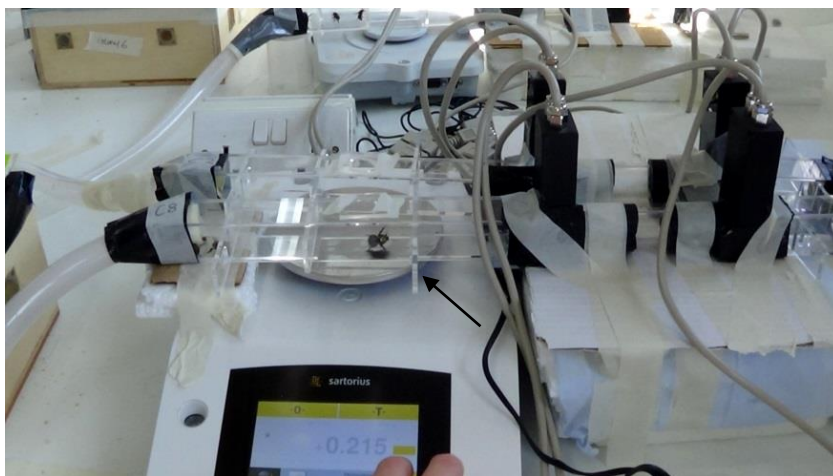

161

162

163

164 **Figure S5.** Box and whisker plots showing foraging bout duration at different stages during in the bee's foraging  
 165 career, beginning with their first foraging bout and ending with their last. The dataset includes all bees that  
 166 completed more than 15 bouts ( $n = 46$ ) to increase the accuracy of estimating 'proportion of total foraging bouts'  
 167 (in effect this excluded only three foragers). The bottom and top of each blue box indicates the 25th and 75th  
 168 percentile (IQR), the thick line horizontal indicates the median, and the whiskers indicate minimum and maximum  
 169 values. The "circles" at the end of the boxplot represent outliers ( $\pm 1.5 \cdot \text{IQR}$ ).

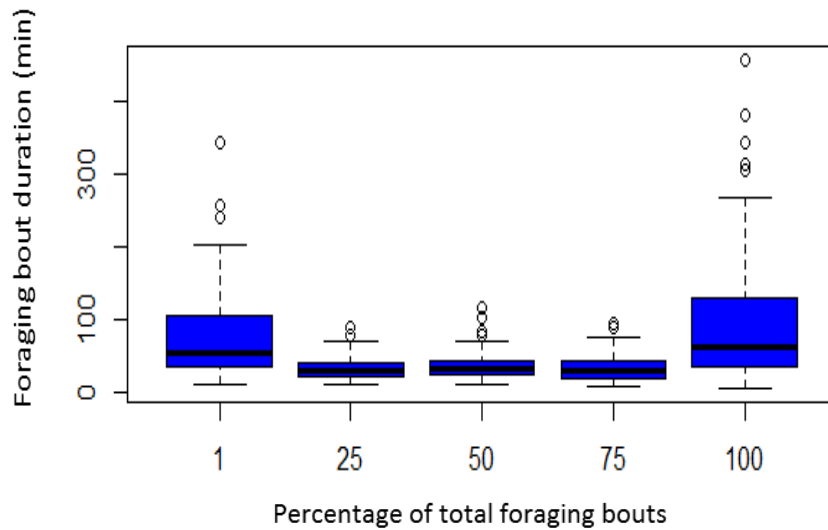

183 **Figure S6.** Average daily humidity % (dashed line), air temperature °C (black line), and rainfall mm (grey line)  
 184 over the duration of our observation period.

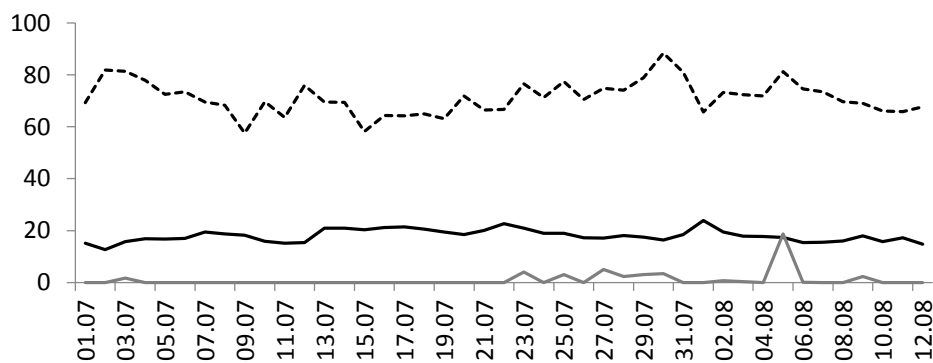



199 **References**

200 1 Ottoni, E. B. EthoLog 2.2: A tool for the transcription and timing of behavior observation  
201 sessions. *Behavior Research Methods Instruments & Computers* **32**, 446-449,  
202 doi:10.3758/bf03200814 (2000).

203 2 Saleh, N. & Chittka, L. The importance of experience in the interpretation of conspecific  
204 chemical signals. *Behavioral Ecology and Sociobiology* **61**, 215-220, doi:10.1007/s00265-006-  
205 0252-7 (2006).

206 3 Raine, N. E. & Chittka, L. The correlation of learning speed and natural foraging success in  
207 bumble-bees. *Proceedings of the Royal Society B* **275**, 803-808, doi:10.1098/rspb.2007.1652  
208 (2008).

209 4 Evans, L. J. & Raine, N. E. Changes in learning and foraging behaviour within developing  
210 bumble bee (*Bombus terrestris*) colonies. *PLoS One* **9**, doi:10.1371/journal.pone.0090556  
211 (2014).

212 5 Capaldi, E. A. & Dyer, F. C. The role of orientation flights on homing performance in  
213 honeybees. *Journal of Experimental Biology* **202**, 1655-1666 (1999).

214 6 Peat, J. & Goulson, D. Effects of experience and weather on foraging rate and pollen versus  
215 nectar collection in the bumblebee, *Bombus terrestris*. *Behavioral Ecology and Sociobiology*  
216 **58**, 152-156, doi:10.1007/s00265-005-0916-8 (2005).

217 7 Zanette, L. R. S., Miller, S. D. L., Faria, C. M. A., Lopez-Vaamonde, C. & Bourke, A. F. G.  
218 Bumble bee workers drift to conspecific nests at field scales. *Ecological Entomology* **39**, 347-  
219 354, doi:10.1111/een.12109 (2014).

220 8 Gill, R. J., Ramos-Rodriguez, O. & Raine, N. E. Combined pesticide exposure severely affects  
221 individual and colony level traits in bees. *Nature* **491**, 105-108, doi:10.1038/nature11585  
222 (2012).

223 9 Molet, M., Chittka, L., Stelzer, R. J., Streit, S. & Raine, N. E. Colony nutritional status  
224 modulates worker responses to foraging recruitment pheromone in the bumblebee *Bombus*  
225 *terrestris*. *Behavioral Ecology and Sociobiology* **62**, 1919-1926, doi:10.1007/s00265-008-  
226 0623-3 (2008).

227

228
